# Supplementary material
Source: PubMed Central journal article supplement (PMC4399860)

**a**

**GH43 (various hemicellulose acting enzymes)**

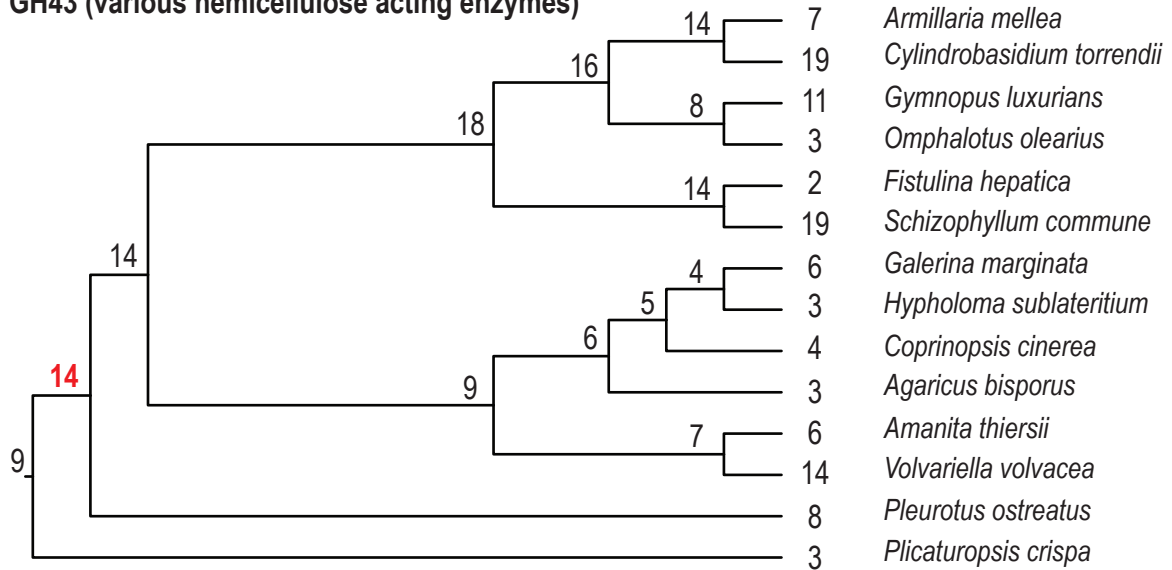

**GH3  
( $\beta$ -glucosidases,  $\beta$ -xylosidase,  
 $\beta$ -N-acetylhexosaminidase )**

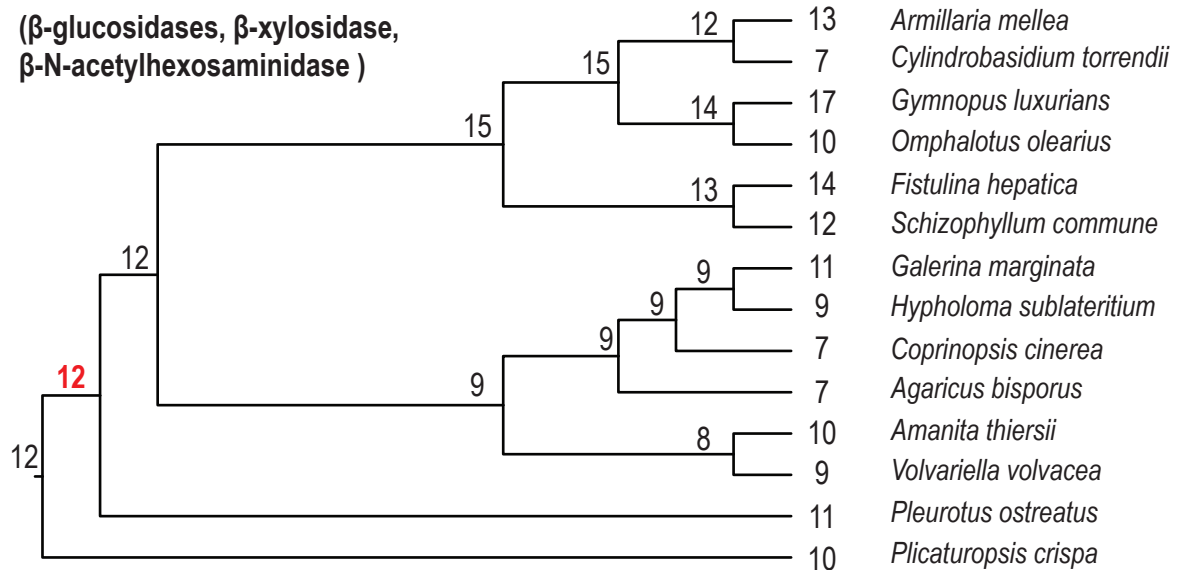

**CE1 / CE16  
(acetyl-xylan esterase, acetyl-esterases)**

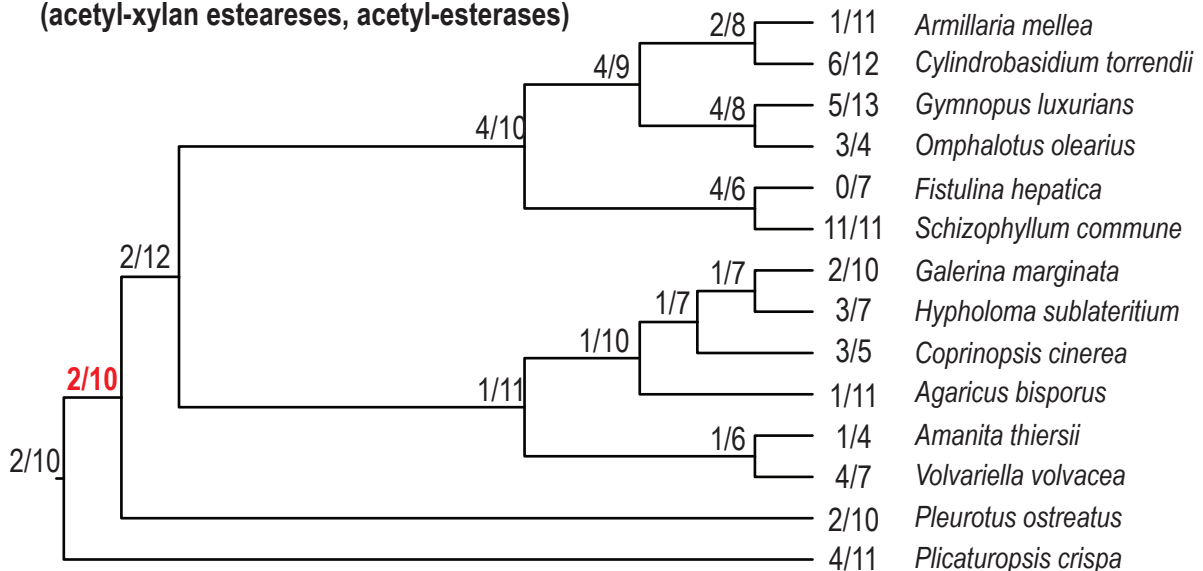

Supplement: NIHMS673826-supplement-4.pdf [file NIHMS673826-supplement-4.pdf]
