# Supplementary material
Source: PubMed Central journal article supplement (PMC4399860)

C

**CE5 / CE15**  
(cutinases, 4-O-methyl-glucuronoyl methylesterase)

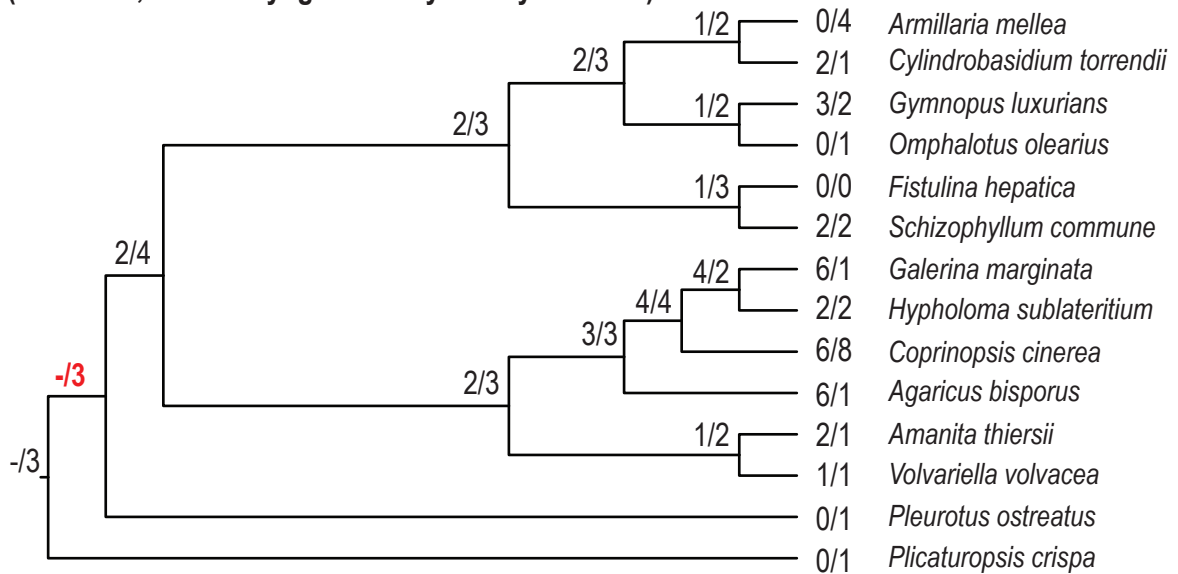

**CE8 / CE12** (pectin methylesterases,  
pectin/ramnogalacturonan acetylerases)

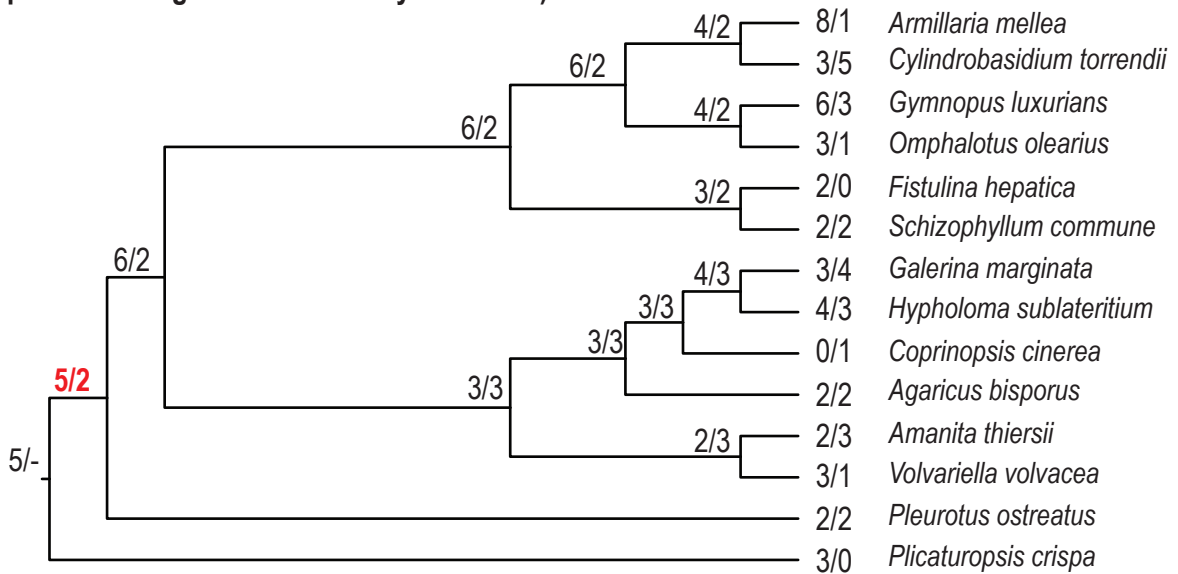

Supplement: NIHMS673826-supplement-6.pdf [file NIHMS673826-supplement-6.pdf]
