# Supplementary material
Source: PubMed Central journal article supplement (PMC4399860)

a

GH6  
Consensus  
Identity

- **Fishe1\_56936**
- **Fishe1\_5391** X
- **Fishe1\_71082**
- **Fishe1\_7081** X
- **Fishe1\_12080** X
- Armme1\_5002
- Armme1\_5001
- Gymlu1\_228104
- Ompol1\_3337
- Hypsu1\_35736
- Volvo1\_113390
- Galma1\_126976
- Galma1\_59609
- Amath1\_135881
- Plicr1\_612990
- Plicr1\_111077
- PleosPC15\_2\_48333
- Volvo1\_113391
- Copci1\_959
- PleosPC15\_2\_1073165
- Agabi\_varbisH97\_2\_190390
- Cylto1\_357176
- Cylto1\_400754
- Cylto1\_450825
- Schco2\_17408
- Copci1\_7131
- Copci1\_7130
- Copci1\_3626
- Copci1\_9032
- Volvo1\_111658
- Volvo1\_121896
- Volvo1\_121491
- Galma1\_104642
- PleosPC15\_2\_1101170

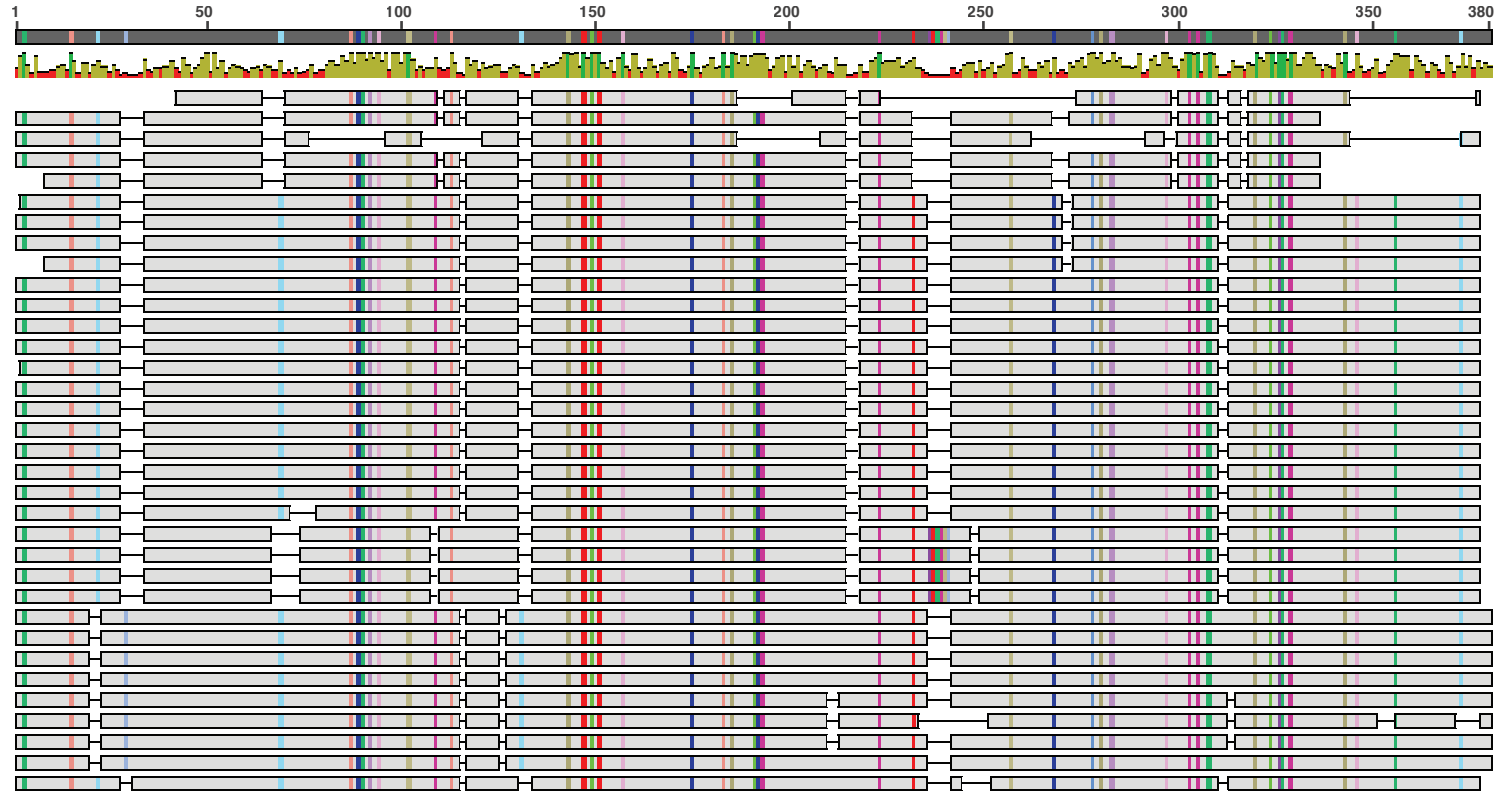

DyP  
clade A

- Galma1\_159433
- Galma1\_143869
- Galma1\_65104
- Volvo1\_120941
- Amath1\_68188
- Galma1\_252241
- Hypsu1\_47206
- Hypsu1\_147511
- Copci1\_2356
- **Fishe1\_57906**
- **Fishe1\_72268**
- Armme1\_3547
- Armme1\_5556
- PleosPC15\_2\_1069077

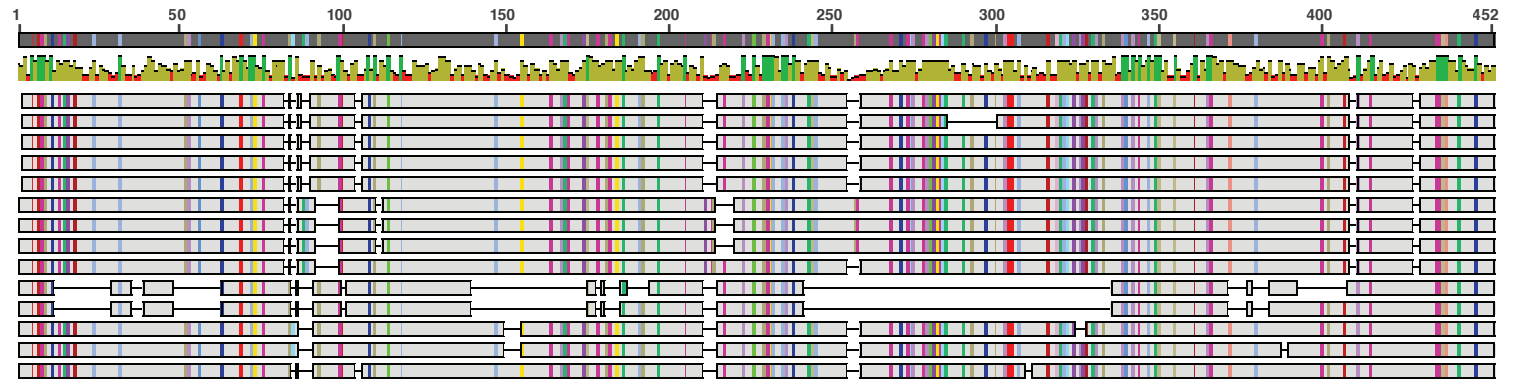

Supplement: NIHMS673826-supplement-7.pdf [file NIHMS673826-supplement-7.pdf]
