# Supplementary material
Source: PubMed Central journal article supplement (PMC4399860)

**b**

GH74

Consensus  
Identity

Agabi\_varbisH97\_2\_214617  
 Volvo1\_112867  
 PleosPC15\_2\_1111407  
 Copci1\_9992  
 PleosPC15\_2\_160547  
 PleosPC15\_2\_1046326  
 Galma1\_218258  
 Galma1\_218259  
 Hypsu1\_126694  
 Amath1\_134977  
 Armme1\_13627  
 →→→  
 →→→  
 Fishe1\_59127  
 Fishe1\_73885  
 Cylto1\_465429  
 Cylto1\_379293  
 Armme1\_12287  
 Schco2\_47702  
 Ompol1\_5304  
 Gymlu1\_147986  
 Plicr1\_100095

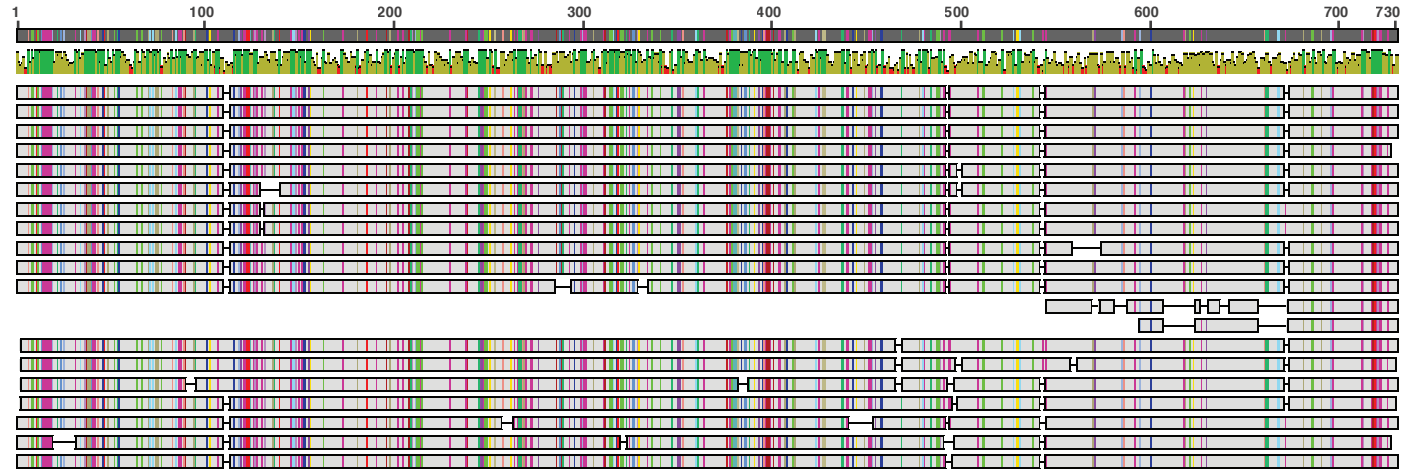

GH5-7

Consensus  
Identity

Gymlu1\_57960  
 Gymlu1\_84185  
 Gymlu1\_153597  
 Gymlu1\_35872  
 Ompol1\_6342  
 Galma1\_138416  
 Galma1\_1312903  
 Plicr1\_473566  
 Plicr1\_172477  
 Armme1\_9886  
 Armme1\_117  
 PleosPC15\_2\_1041534  
 PleosPC15\_2\_158584  
 Copci1\_7970  
 Cylto1\_226035  
 Agabi\_varbisH97\_2\_192609  
 PleosPC15\_2\_1041600  
 Hypsu1\_70205  
 Galma1\_75662  
 Copci1\_7990  
 Schco2\_1191858  
 Galma1\_155465  
 Galma1\_231330  
 Galma1\_151167  
 Galma1\_218154  
 Hypsu1\_127558  
 Gymlu1\_33208  
 Ompol1\_5221  
 Amath1\_185172  
 PleosPC15\_2\_49423  
 →  
 Fishe1\_59909  
 Armme1\_5313  
 Volvo1\_112784  
 Copci1\_5824

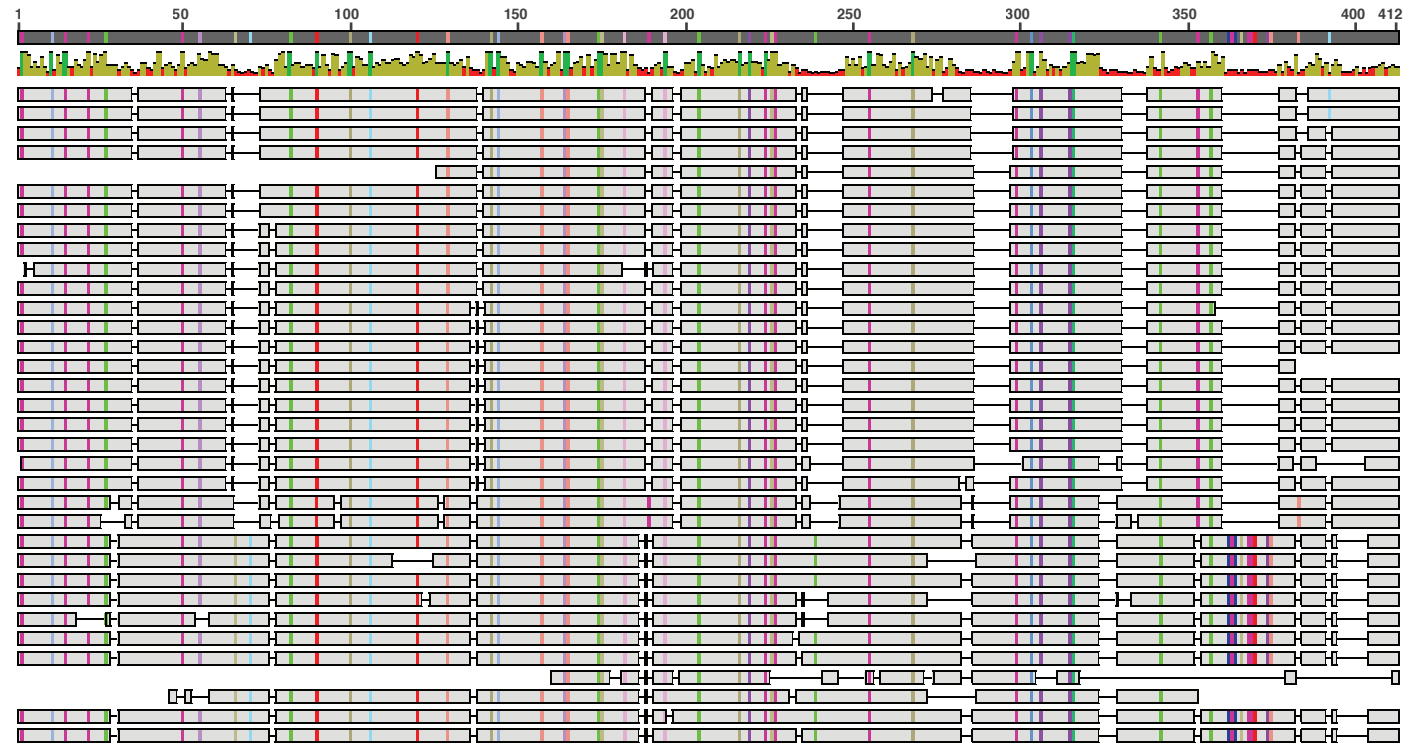

Supplement: NIHMS673826-supplement-8.pdf [file NIHMS673826-supplement-8.pdf]
