# Supplementary material
Source: PubMed Central journal article supplement (PMC4399860)

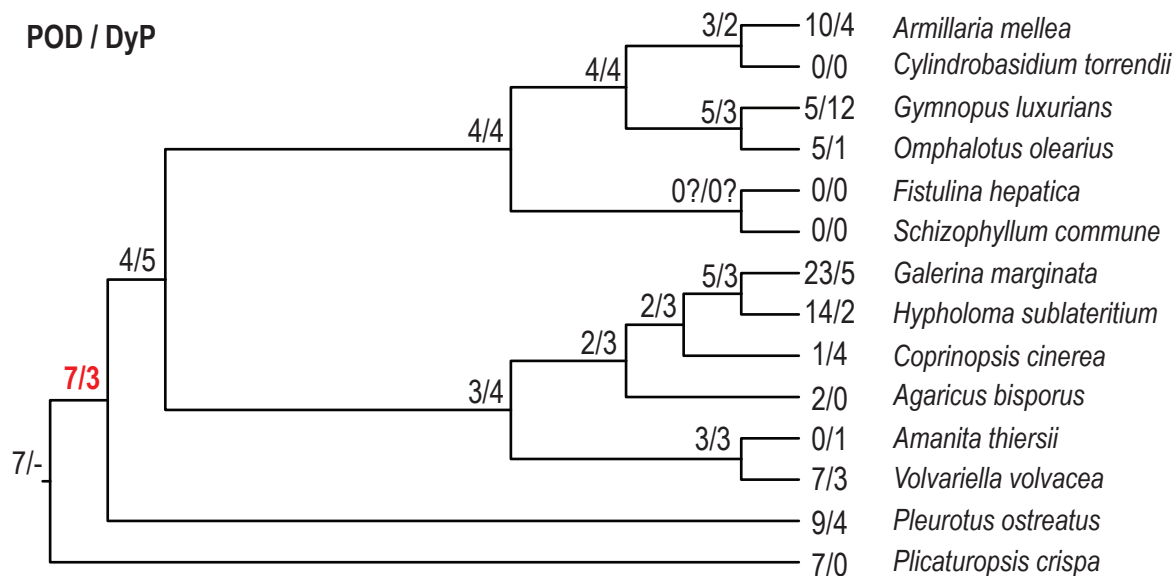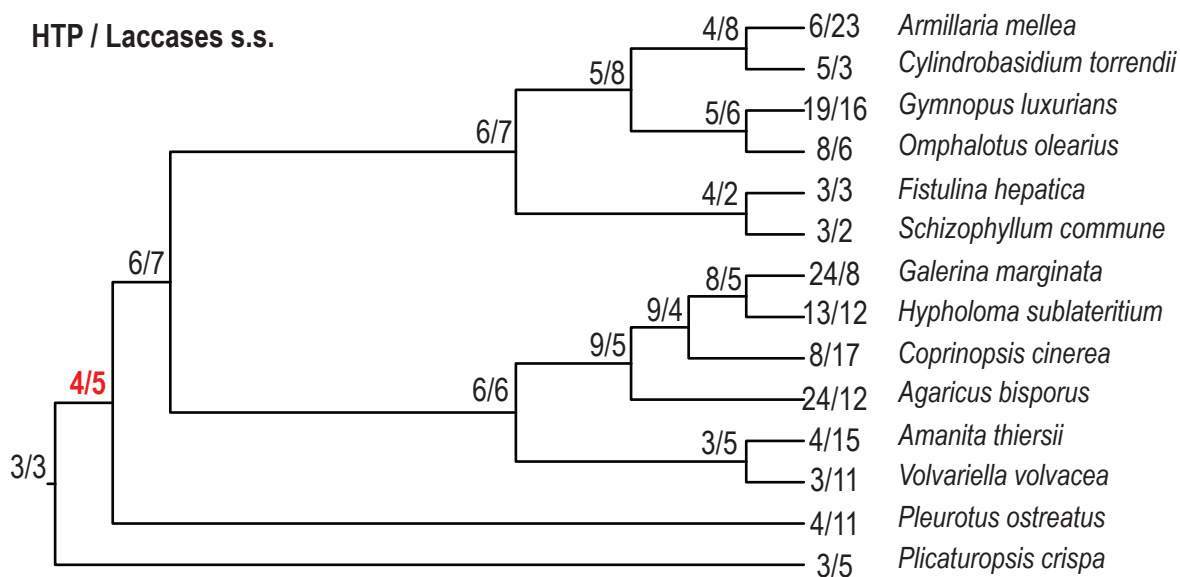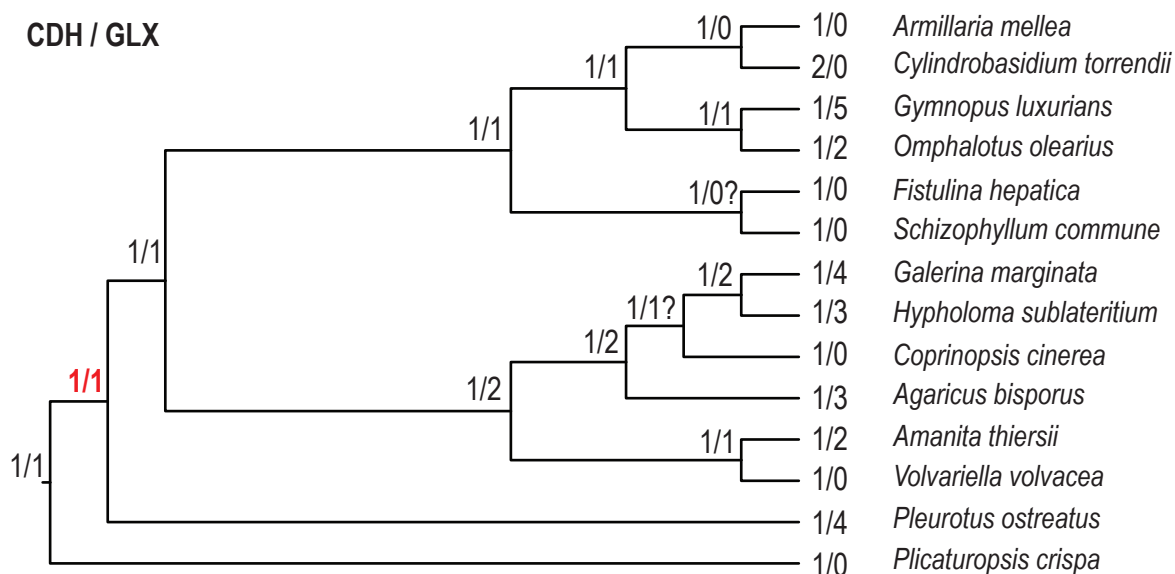

Supplement: NIHMS673826-supplement-1.pdf [file NIHMS673826-supplement-1.pdf]

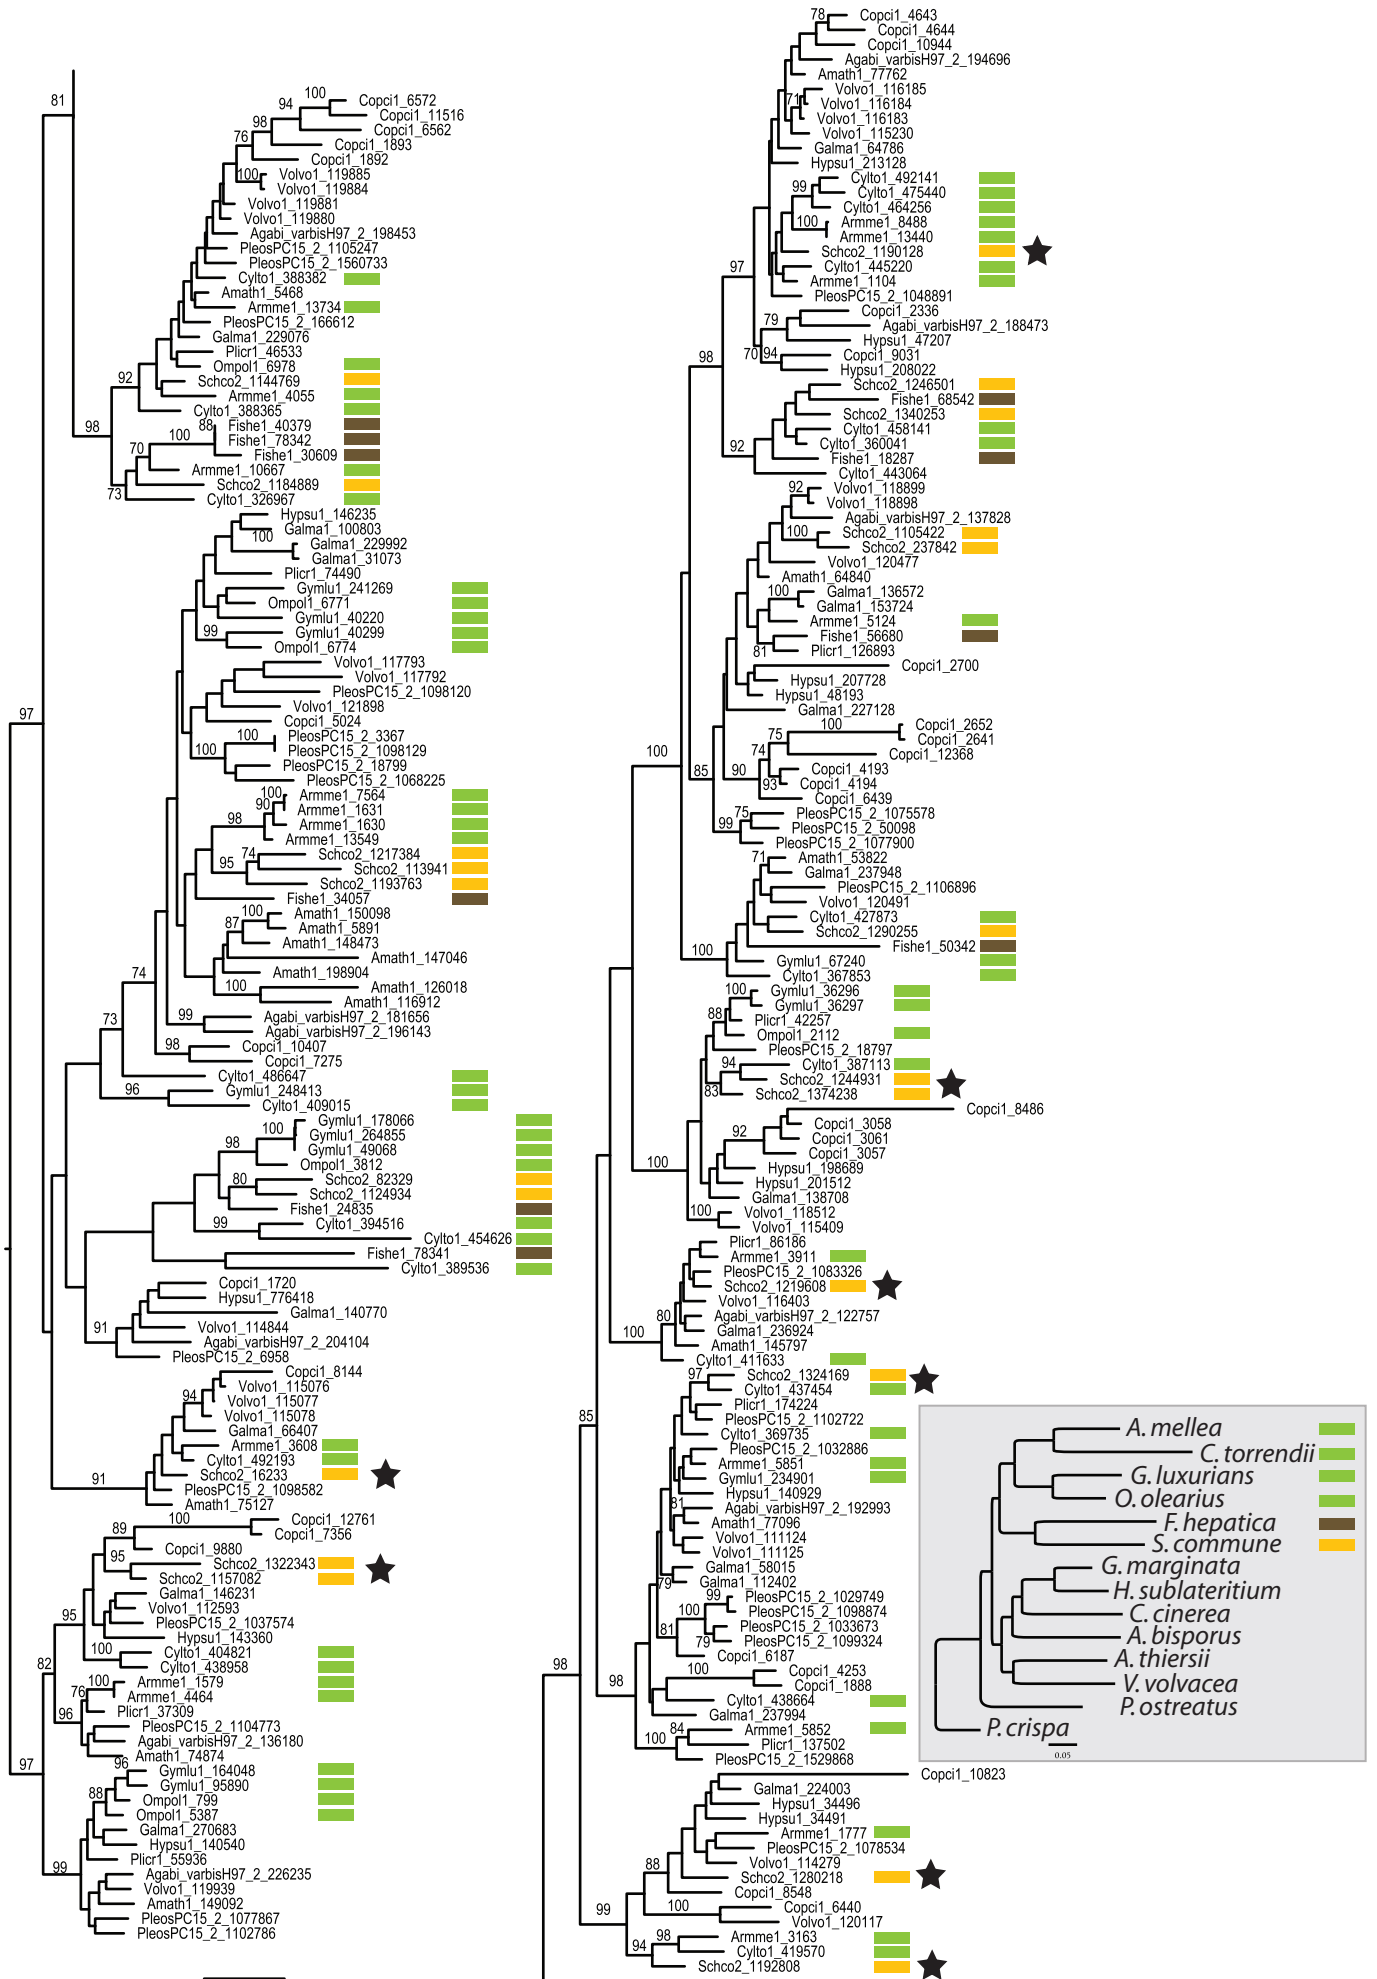

0.4

Supplement: NIHMS673826-supplement-10.pdf [file NIHMS673826-supplement-10.pdf]

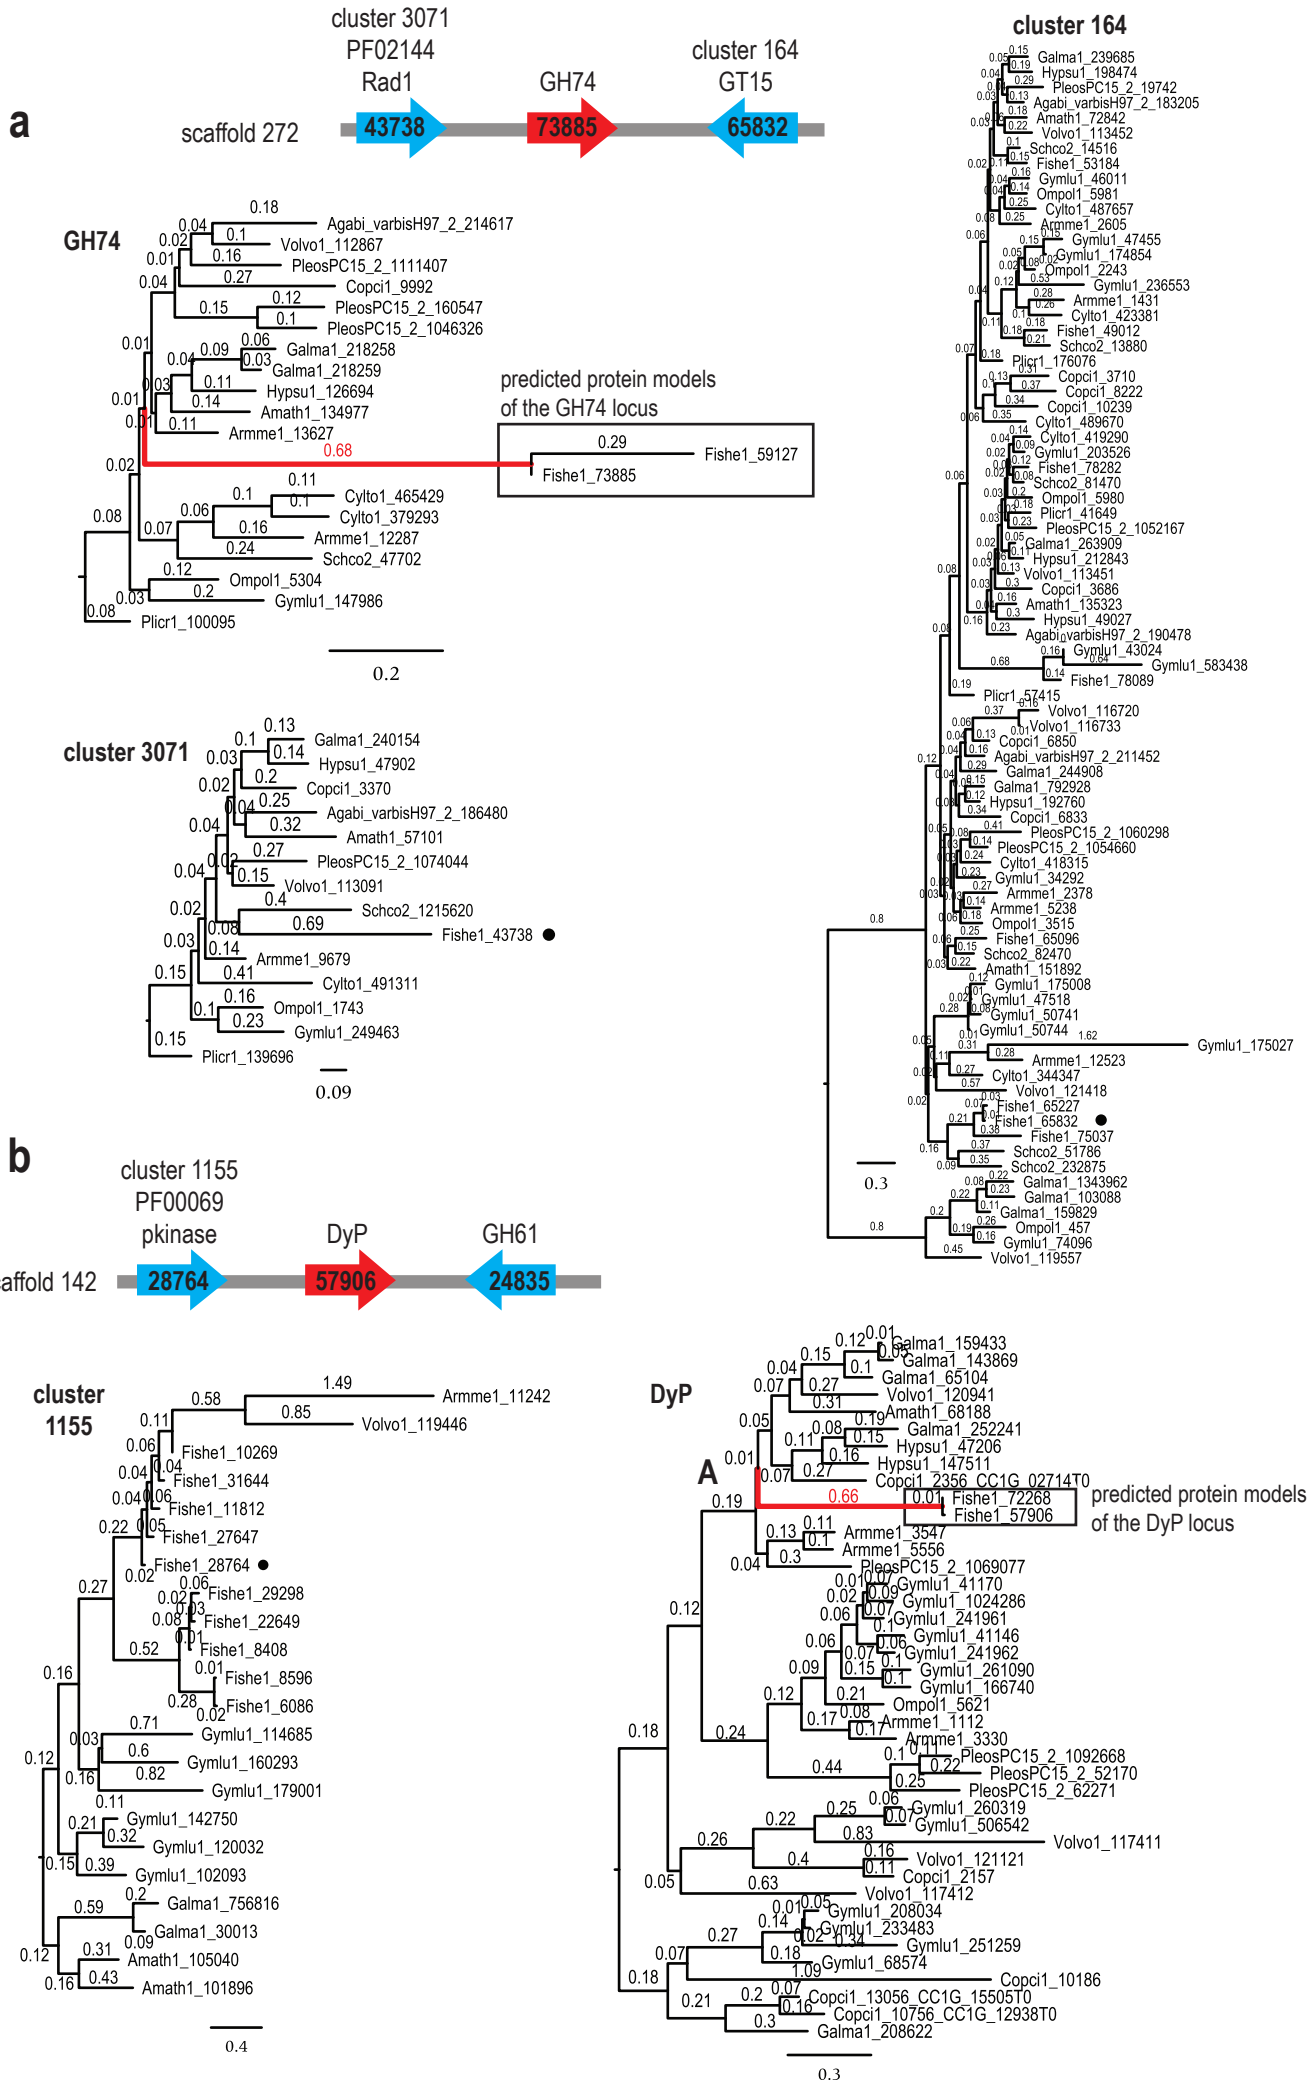

Supplement: NIHMS673826-supplement-11.pdf [file NIHMS673826-supplement-11.pdf]

C

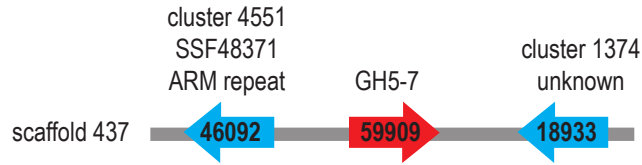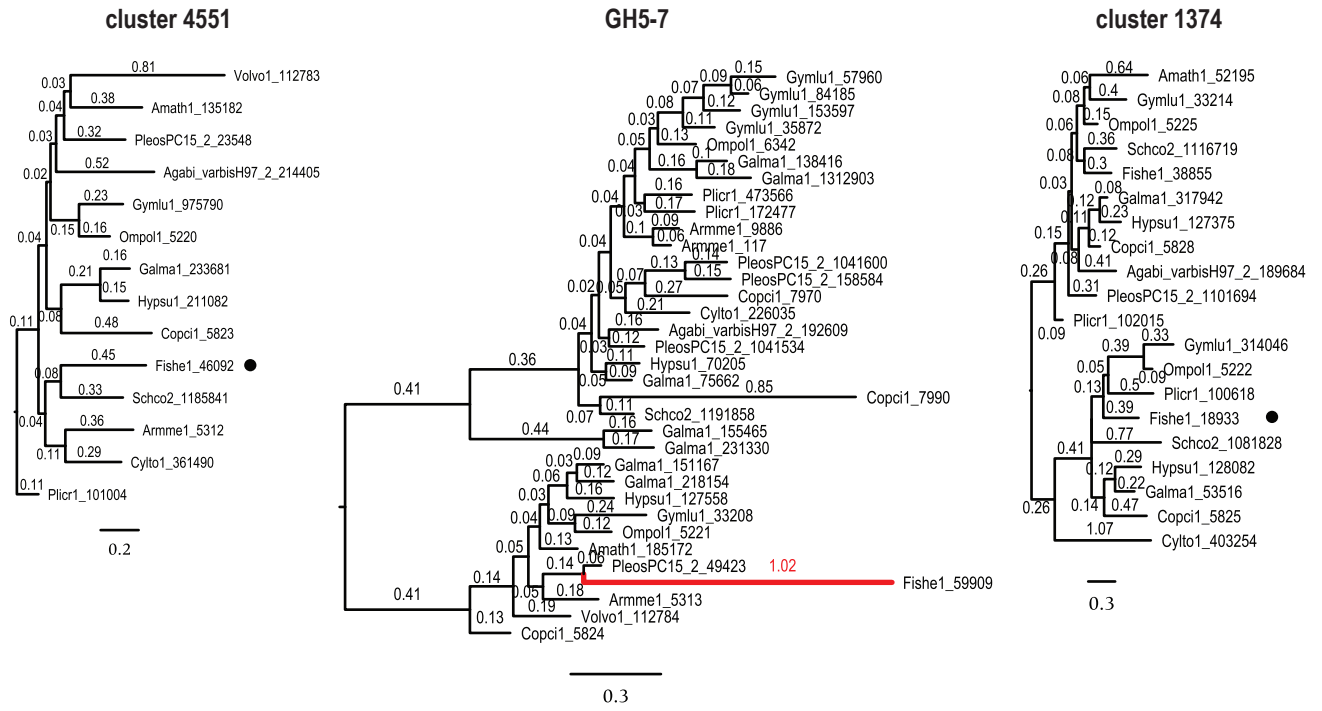

Supplement: NIHMS673826-supplement-12.pdf [file NIHMS673826-supplement-12.pdf]

**a****GH6 / GH7 / LPMO**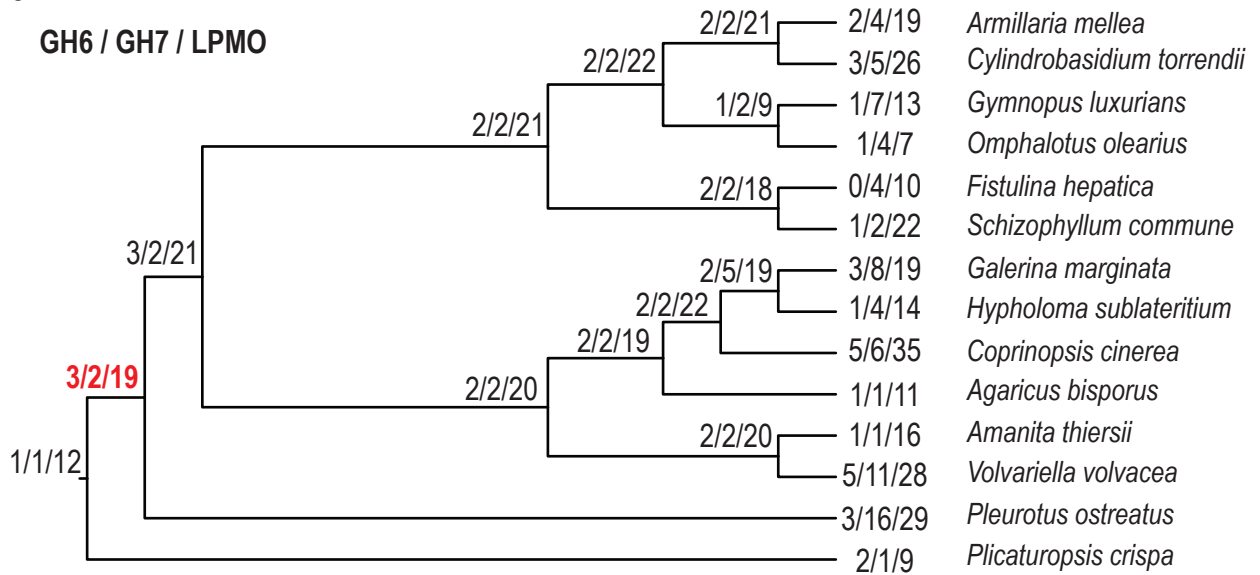**GH5-7 (endomannanases)**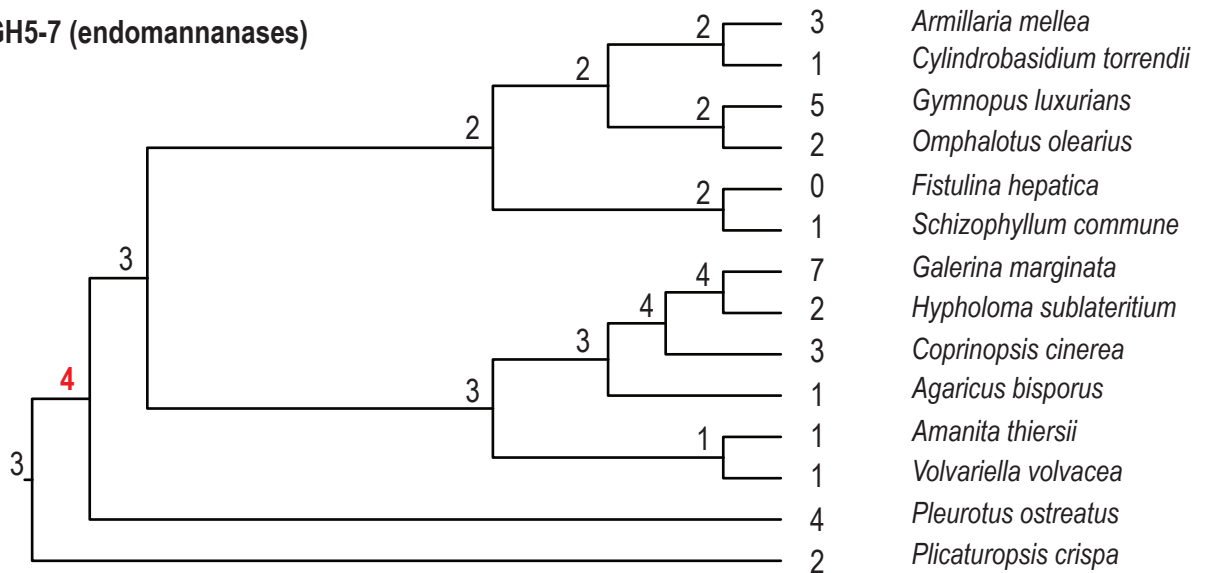**GH28 (pectinases)**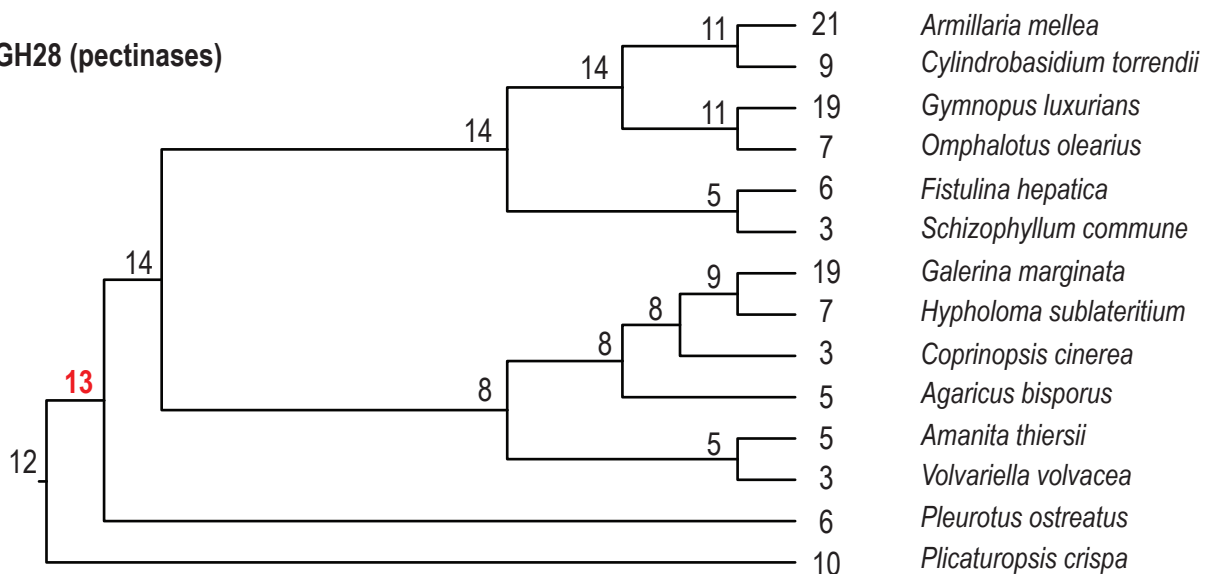

Supplement: NIHMS673826-supplement-2.pdf [file NIHMS673826-supplement-2.pdf]

**b****GH10 / GH11 (endoxy lanases)**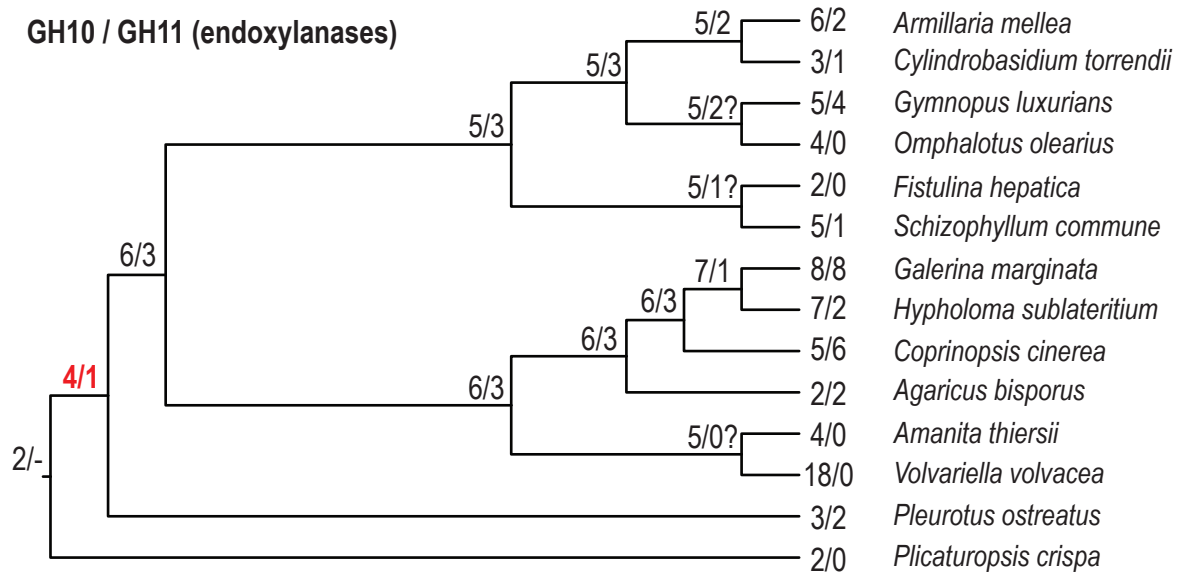**GH12 / GH74 (endoglucanases, xyloglucanases)**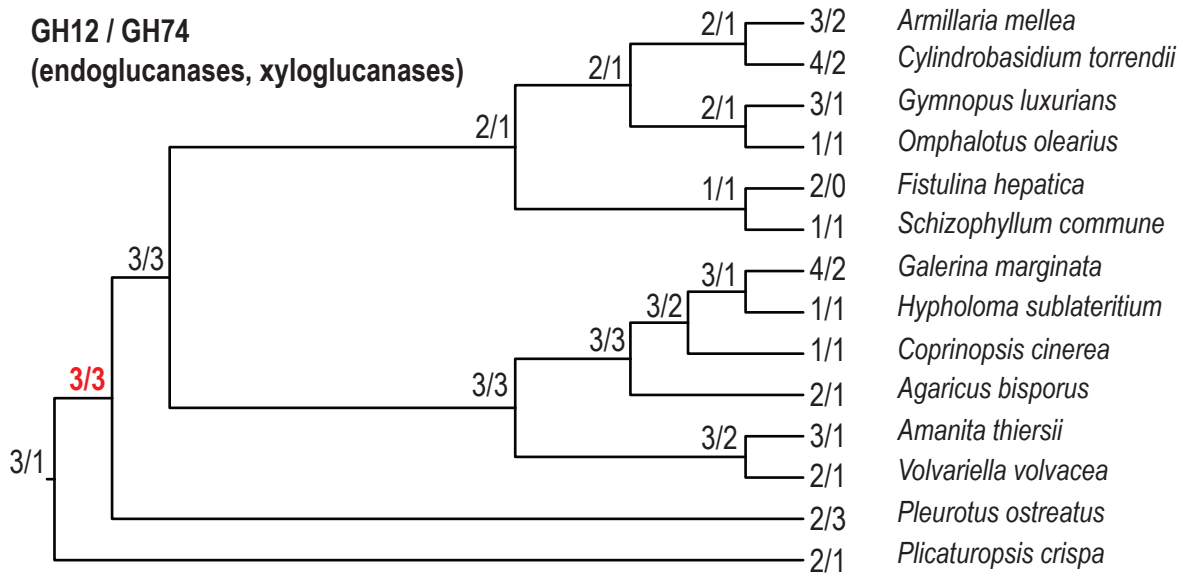**GH5-5 / GH45 (endoglucanases)**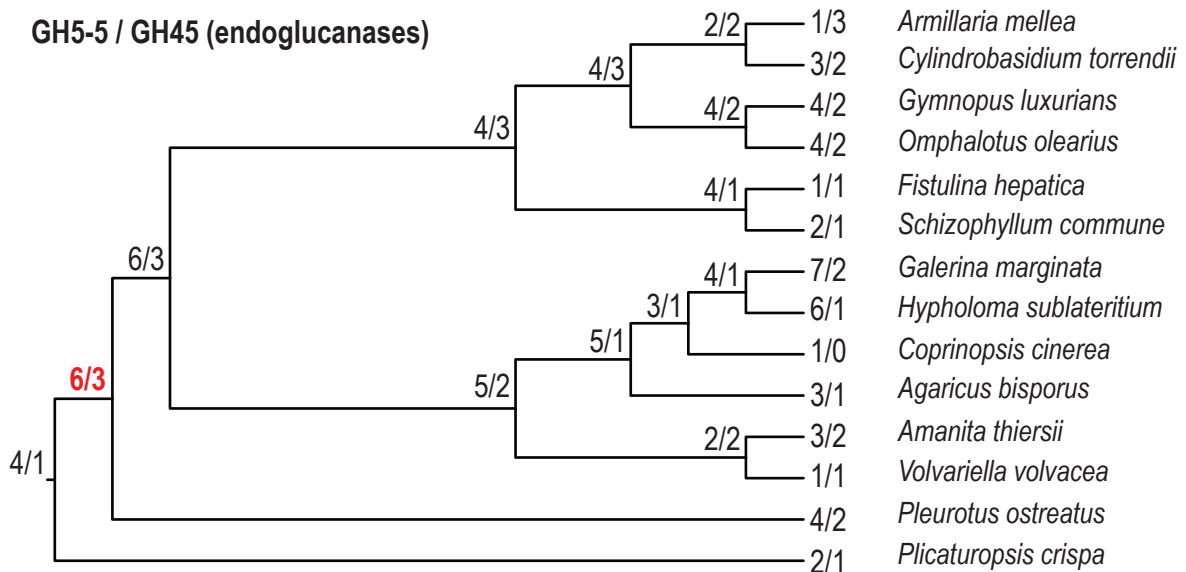

Supplement: NIHMS673826-supplement-3.pdf [file NIHMS673826-supplement-3.pdf]

**b**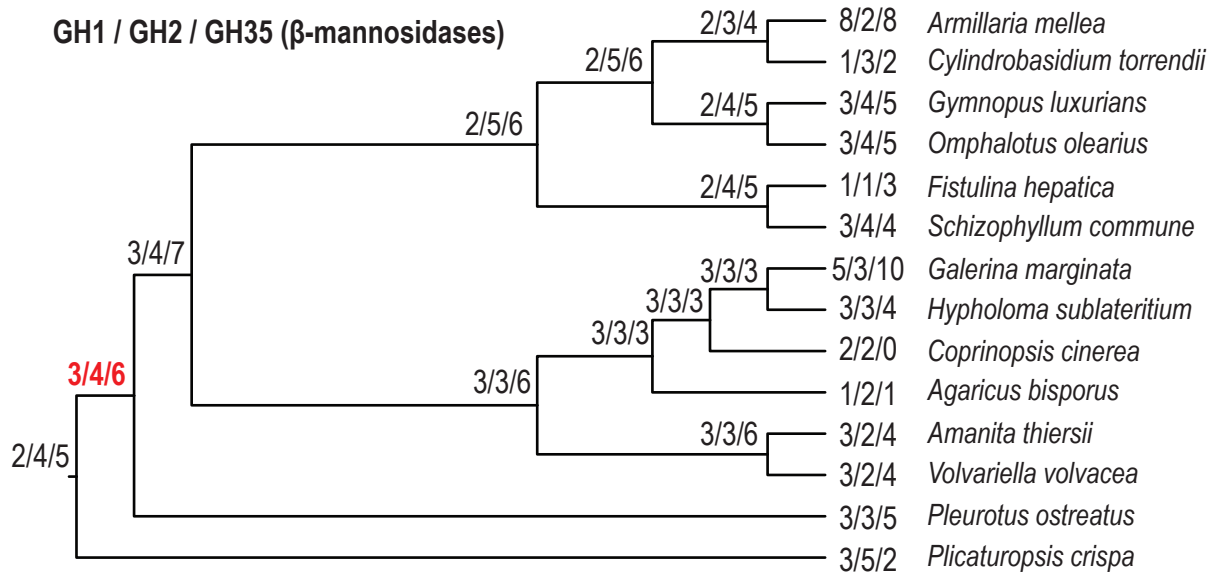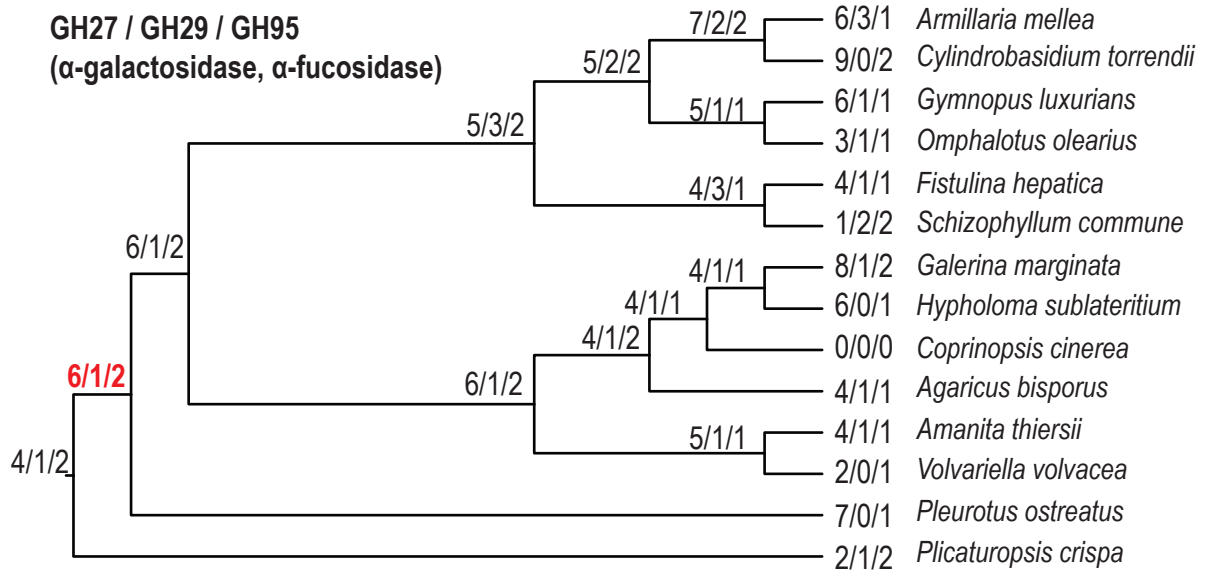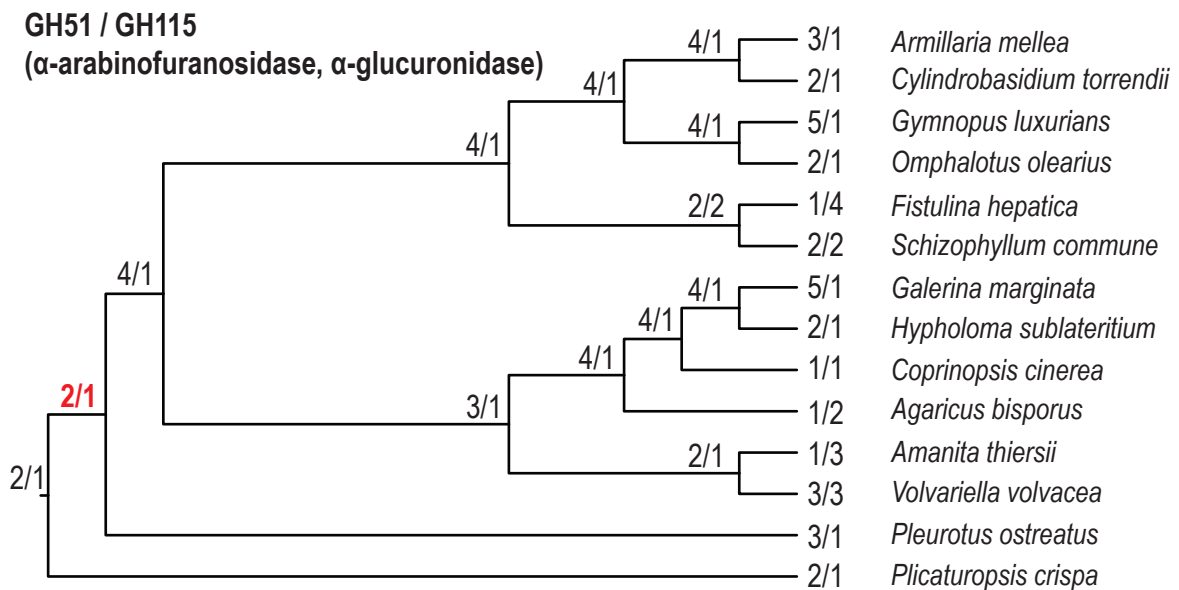

Supplement: NIHMS673826-supplement-5.pdf [file NIHMS673826-supplement-5.pdf]

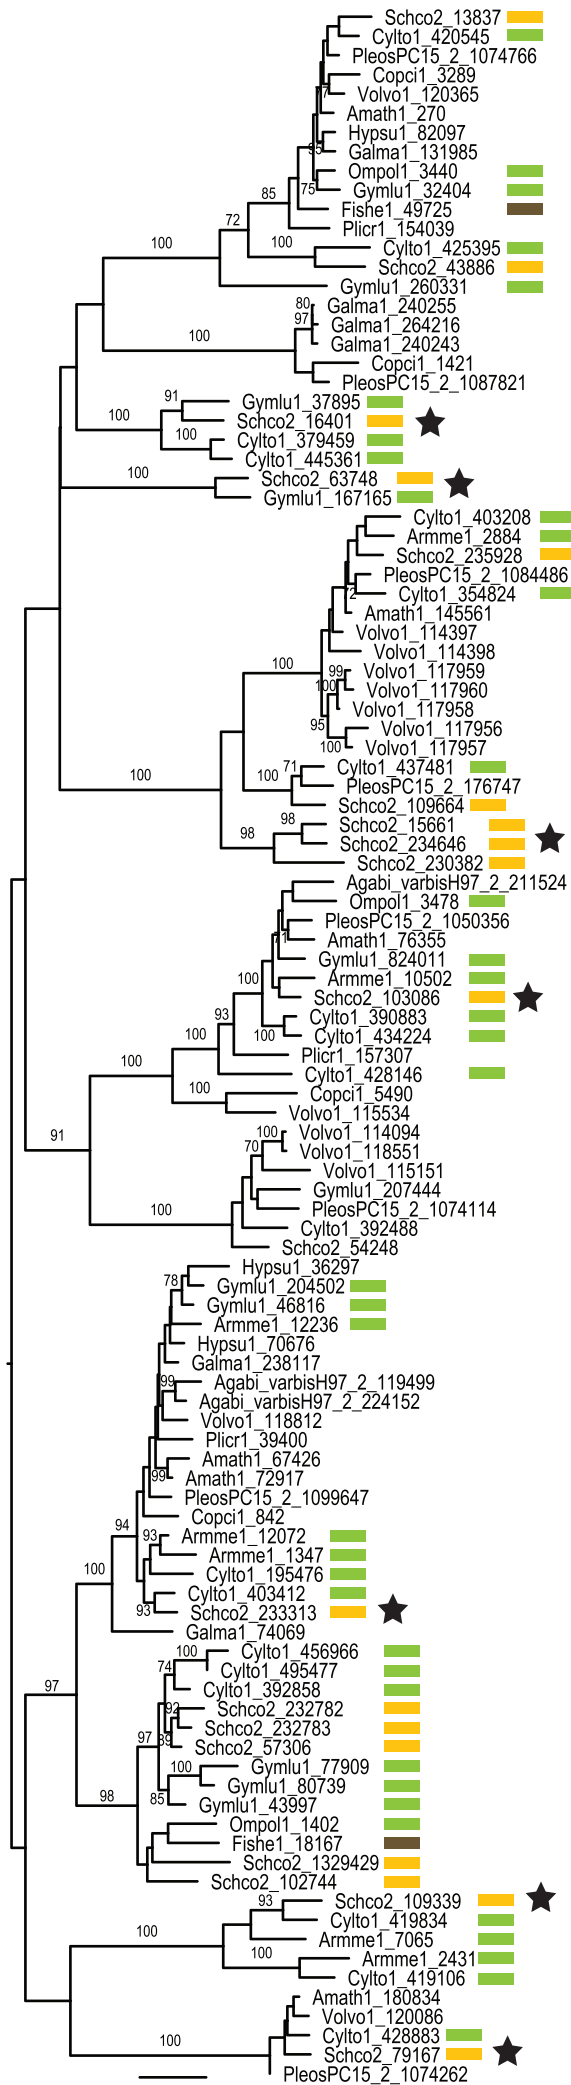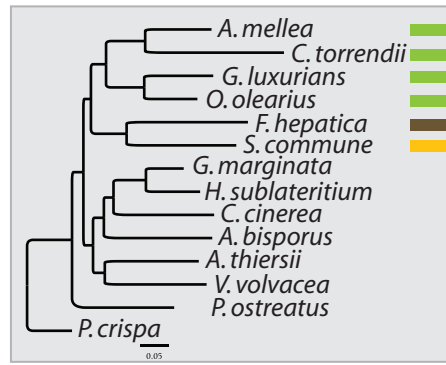

0.5

Supplement: NIHMS673826-supplement-9.pdf [file NIHMS673826-supplement-9.pdf]
